# Supplementary material
Source: publisher figshare collection journal article supplement (https://frontiersin.figshare.com/ndownloader/files/28294629)
Supplement: Supplementary file [file 28294629]

## Supplementary Figure 1

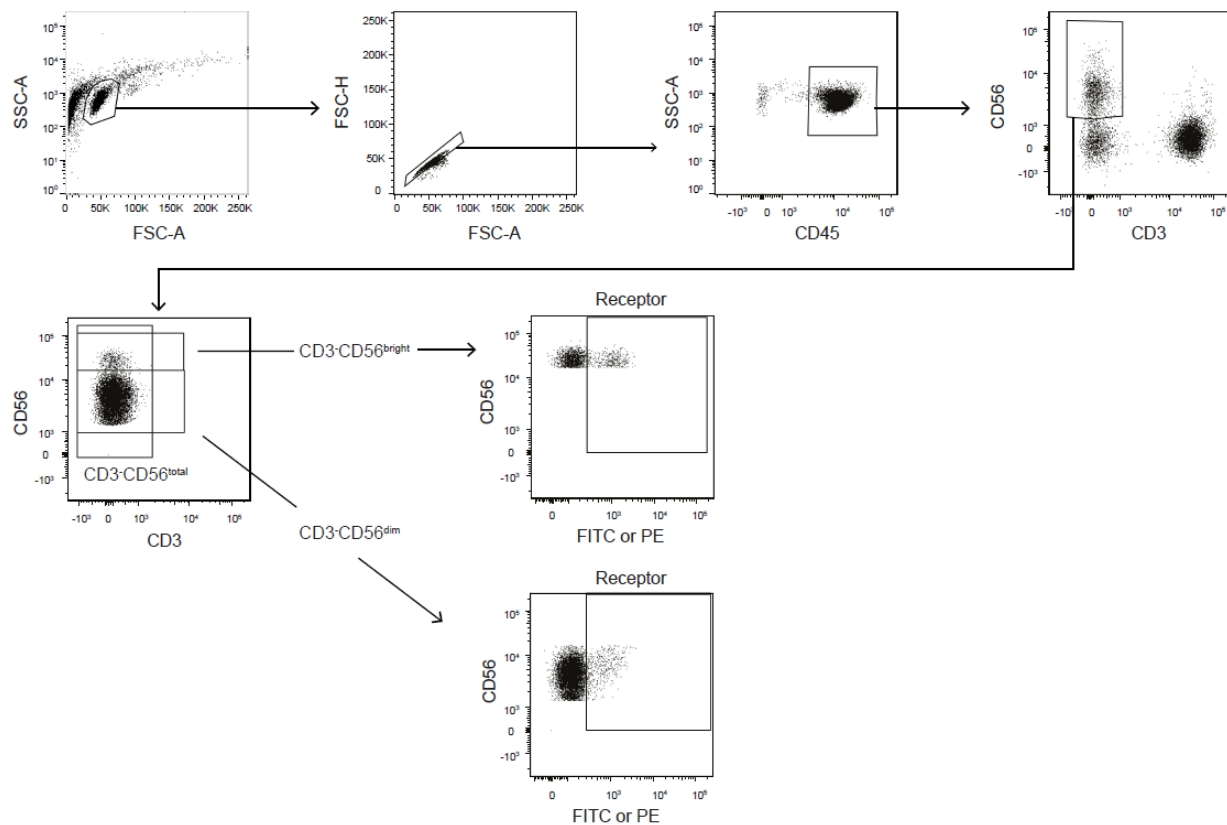

**Strategy used to gate PBNC from ccRCC patients and HD, and to assess the expression of different cell surface receptors.** NK cells were defined as CD3<sup>-</sup>CD56<sup>+</sup> cells in the CD45<sup>+</sup> cell population and NK cell subsets were further characterized as CD3<sup>-</sup>CD56<sup>bright</sup> and CD3<sup>-</sup>CD56<sup>dim</sup> cells.
